# Supplementary material for: Genome sequence and genetic diversity analysis of an under-domesticated orphan crop, white fonio (Digitaria exilis)
Source: PubMed Central journal article supplement (PMC7953496; doi:10.1093/gigascience/giab013), 2021-03-12
Supplement: giab013_giga-d-20-00197_revision_1.pdf [file giab013_giga-d-20-00197_revision_1.pdf]

## Genome sequence and genetic diversity analysis of an under-domesticated orphan crop, white fonio (*Digitaria exilis*) --Manuscript Draft--

|                                                      |                                                                                                                                                                                                                                                                                                                                                                                                                                                                                                                                                                                                                                                                                                                                                                                                                                                                                                                                                                                                                                                                                                                                                                                                                                                                                                                                                                                                                                                                                                                                                                                                                                                              |                         |
|------------------------------------------------------|--------------------------------------------------------------------------------------------------------------------------------------------------------------------------------------------------------------------------------------------------------------------------------------------------------------------------------------------------------------------------------------------------------------------------------------------------------------------------------------------------------------------------------------------------------------------------------------------------------------------------------------------------------------------------------------------------------------------------------------------------------------------------------------------------------------------------------------------------------------------------------------------------------------------------------------------------------------------------------------------------------------------------------------------------------------------------------------------------------------------------------------------------------------------------------------------------------------------------------------------------------------------------------------------------------------------------------------------------------------------------------------------------------------------------------------------------------------------------------------------------------------------------------------------------------------------------------------------------------------------------------------------------------------|-------------------------|
| <b>Manuscript Number:</b>                            | GIGA-D-20-00197R1                                                                                                                                                                                                                                                                                                                                                                                                                                                                                                                                                                                                                                                                                                                                                                                                                                                                                                                                                                                                                                                                                                                                                                                                                                                                                                                                                                                                                                                                                                                                                                                                                                            |                         |
| <b>Full Title:</b>                                   | Genome sequence and genetic diversity analysis of an under-domesticated orphan crop, white fonio ( <i>Digitaria exilis</i> )                                                                                                                                                                                                                                                                                                                                                                                                                                                                                                                                                                                                                                                                                                                                                                                                                                                                                                                                                                                                                                                                                                                                                                                                                                                                                                                                                                                                                                                                                                                                 |                         |
| <b>Article Type:</b>                                 | Data Note                                                                                                                                                                                                                                                                                                                                                                                                                                                                                                                                                                                                                                                                                                                                                                                                                                                                                                                                                                                                                                                                                                                                                                                                                                                                                                                                                                                                                                                                                                                                                                                                                                                    |                         |
| <b>Funding Information:</b>                          | Giles Fellowship from the University of Georgia                                                                                                                                                                                                                                                                                                                                                                                                                                                                                                                                                                                                                                                                                                                                                                                                                                                                                                                                                                                                                                                                                                                                                                                                                                                                                                                                                                                                                                                                                                                                                                                                              | Dr Jeffrey L. Bennetzen |
|                                                      | H2020 European Research Council (833522)                                                                                                                                                                                                                                                                                                                                                                                                                                                                                                                                                                                                                                                                                                                                                                                                                                                                                                                                                                                                                                                                                                                                                                                                                                                                                                                                                                                                                                                                                                                                                                                                                     | Dr Yves Van de Peer     |
|                                                      | Seed Biotechnology Center, UC Davis                                                                                                                                                                                                                                                                                                                                                                                                                                                                                                                                                                                                                                                                                                                                                                                                                                                                                                                                                                                                                                                                                                                                                                                                                                                                                                                                                                                                                                                                                                                                                                                                                          | DR. Allen Van Deynze    |
|                                                      | ICRISAT                                                                                                                                                                                                                                                                                                                                                                                                                                                                                                                                                                                                                                                                                                                                                                                                                                                                                                                                                                                                                                                                                                                                                                                                                                                                                                                                                                                                                                                                                                                                                                                                                                                      | Dr Jason Wallace        |
|                                                      | McKnight Foundation                                                                                                                                                                                                                                                                                                                                                                                                                                                                                                                                                                                                                                                                                                                                                                                                                                                                                                                                                                                                                                                                                                                                                                                                                                                                                                                                                                                                                                                                                                                                                                                                                                          | Dr Moussa D. Sanogo     |
| <b>Abstract:</b>                                     | <p><b>Background:</b> <i>Digitaria exilis</i>, white fonio, is a minor but vital crop of West Africa that is valued for its resilience in hot, dry and low fertility environments and for the exceptional quality of its grain for human nutrition. The crop is plagued, however, by a low degree of improvement.</p> <p><b>Findings:</b> We sequenced the fonio genome with long-read SMRT-cell technology, yielding a ~761 Mb assembly in 3333 contigs (N50 1.73 Mb, L50 126). The assembly approaches a high level of completion, with a BUSCO score of greater than 99%. The fonio genome was found to be a tetraploid, with most of the genome retained as homoeologous duplications that differ overall by ~4.3%, neglecting indels. The two genomes within fonio were found to have begun their independent divergence ~3.1 million years ago. The repeat content (&gt;49%) is fairly standard for a grass genome of this size, but the ratio of Gypsy to Copia LTR-retrotransposons (~6.7) was found to be exceptionally high. Several genes related to future improvement of the crop were identified including shattering, plant height and grain size. Analysis of fonio population genetics, primarily in Mali, indicated that the crop has extensive genetic diversity that is largely partitioned across a north-south gradient coinciding with the Sahel and Sudan grassland domains.</p> <p><b>Conclusions:</b> We provide a high-quality assembly, annotation and diversity analysis for a vital African crop. The availability of this information should empower future research into further domestication and improvement of fonio.</p> |                         |
| <b>Corresponding Author:</b>                         | Allen Van Deynze, Ph.D<br>University of California Davis<br>Davis, CA UNITED STATES                                                                                                                                                                                                                                                                                                                                                                                                                                                                                                                                                                                                                                                                                                                                                                                                                                                                                                                                                                                                                                                                                                                                                                                                                                                                                                                                                                                                                                                                                                                                                                          |                         |
| <b>Corresponding Author Secondary Information:</b>   |                                                                                                                                                                                                                                                                                                                                                                                                                                                                                                                                                                                                                                                                                                                                                                                                                                                                                                                                                                                                                                                                                                                                                                                                                                                                                                                                                                                                                                                                                                                                                                                                                                                              |                         |
| <b>Corresponding Author's Institution:</b>           | University of California Davis                                                                                                                                                                                                                                                                                                                                                                                                                                                                                                                                                                                                                                                                                                                                                                                                                                                                                                                                                                                                                                                                                                                                                                                                                                                                                                                                                                                                                                                                                                                                                                                                                               |                         |
| <b>Corresponding Author's Secondary Institution:</b> |                                                                                                                                                                                                                                                                                                                                                                                                                                                                                                                                                                                                                                                                                                                                                                                                                                                                                                                                                                                                                                                                                                                                                                                                                                                                                                                                                                                                                                                                                                                                                                                                                                                              |                         |
| <b>First Author:</b>                                 | Jeffrey L. Bennetzen                                                                                                                                                                                                                                                                                                                                                                                                                                                                                                                                                                                                                                                                                                                                                                                                                                                                                                                                                                                                                                                                                                                                                                                                                                                                                                                                                                                                                                                                                                                                                                                                                                         |                         |
| <b>First Author Secondary Information:</b>           |                                                                                                                                                                                                                                                                                                                                                                                                                                                                                                                                                                                                                                                                                                                                                                                                                                                                                                                                                                                                                                                                                                                                                                                                                                                                                                                                                                                                                                                                                                                                                                                                                                                              |                         |
| <b>Order of Authors:</b>                             | Jeffrey L. Bennetzen                                                                                                                                                                                                                                                                                                                                                                                                                                                                                                                                                                                                                                                                                                                                                                                                                                                                                                                                                                                                                                                                                                                                                                                                                                                                                                                                                                                                                                                                                                                                                                                                                                         |                         |
|                                                      | Shiyu Chen                                                                                                                                                                                                                                                                                                                                                                                                                                                                                                                                                                                                                                                                                                                                                                                                                                                                                                                                                                                                                                                                                                                                                                                                                                                                                                                                                                                                                                                                                                                                                                                                                                                   |                         |
|                                                      | Xiao Ma                                                                                                                                                                                                                                                                                                                                                                                                                                                                                                                                                                                                                                                                                                                                                                                                                                                                                                                                                                                                                                                                                                                                                                                                                                                                                                                                                                                                                                                                                                                                                                                                                                                      |                         |
|                                                      | Xuewen Wang                                                                                                                                                                                                                                                                                                                                                                                                                                                                                                                                                                                                                                                                                                                                                                                                                                                                                                                                                                                                                                                                                                                                                                                                                                                                                                                                                                                                                                                                                                                                                                                                                                                  |                         |
|                                                      |                                                                                                                                                                                                                                                                                                                                                                                                                                                                                                                                                                                                                                                                                                                                                                                                                                                                                                                                                                                                                                                                                                                                                                                                                                                                                                                                                                                                                                                                                                                                                                                                                                                              |                         |

|                                                                                                                                                                                                                                                                                                                                                                         |                                                                                              |
|-------------------------------------------------------------------------------------------------------------------------------------------------------------------------------------------------------------------------------------------------------------------------------------------------------------------------------------------------------------------------|----------------------------------------------------------------------------------------------|
|                                                                                                                                                                                                                                                                                                                                                                         | Anna E. J. Yssel                                                                             |
|                                                                                                                                                                                                                                                                                                                                                                         | Srinivasa R. Chaluvadi                                                                       |
|                                                                                                                                                                                                                                                                                                                                                                         | Matthew Johnson                                                                              |
|                                                                                                                                                                                                                                                                                                                                                                         | Prakash Gangashetty                                                                          |
|                                                                                                                                                                                                                                                                                                                                                                         | Falalou Hamidou                                                                              |
|                                                                                                                                                                                                                                                                                                                                                                         | Moussa D. Sanogo                                                                             |
|                                                                                                                                                                                                                                                                                                                                                                         | Arthur Zwaenepoel                                                                            |
|                                                                                                                                                                                                                                                                                                                                                                         | Jason Wallace                                                                                |
|                                                                                                                                                                                                                                                                                                                                                                         | Yves Van de Peer                                                                             |
|                                                                                                                                                                                                                                                                                                                                                                         | Allen Van Deynze, Ph.D                                                                       |
| <b>Order of Authors Secondary Information:</b>                                                                                                                                                                                                                                                                                                                          |                                                                                              |
| <b>Response to Reviewers:</b>                                                                                                                                                                                                                                                                                                                                           | See enclosed file under Personal Cover-Response to Review and Manuscript R1 tracked changes. |
| <b>Additional Information:</b>                                                                                                                                                                                                                                                                                                                                          |                                                                                              |
| <b>Question</b>                                                                                                                                                                                                                                                                                                                                                         | <b>Response</b>                                                                              |
| Are you submitting this manuscript to a special series or article collection?                                                                                                                                                                                                                                                                                           | No                                                                                           |
| <b>Experimental design and statistics</b>                                                                                                                                                                                                                                                                                                                               | Yes                                                                                          |
| Full details of the experimental design and statistical methods used should be given in the Methods section, as detailed in our <a href="#">Minimum Standards Reporting Checklist</a> . Information essential to interpreting the data presented should be made available in the figure legends.                                                                        |                                                                                              |
| Have you included all the information requested in your manuscript?                                                                                                                                                                                                                                                                                                     |                                                                                              |
| <b>Resources</b>                                                                                                                                                                                                                                                                                                                                                        | Yes                                                                                          |
| A description of all resources used, including antibodies, cell lines, animals and software tools, with enough information to allow them to be uniquely identified, should be included in the Methods section. Authors are strongly encouraged to cite <a href="#">Research Resource Identifiers</a> (RRIDs) for antibodies, model organisms and tools, where possible. |                                                                                              |
| Have you included the information                                                                                                                                                                                                                                                                                                                                       |                                                                                              |

|                                                                                                                                                                                                                                                                                                                                                                                                                                                                                                                                                         |            |
|---------------------------------------------------------------------------------------------------------------------------------------------------------------------------------------------------------------------------------------------------------------------------------------------------------------------------------------------------------------------------------------------------------------------------------------------------------------------------------------------------------------------------------------------------------|------------|
| <p>requested as detailed in our <a href="#">Minimum Standards Reporting Checklist</a>?</p>                                                                                                                                                                                                                                                                                                                                                                                                                                                              |            |
| <p><b>Availability of data and materials</b></p> <p>All datasets and code on which the conclusions of the paper rely must be either included in your submission or deposited in <a href="#">publicly available repositories</a> (where available and ethically appropriate), referencing such data using a unique identifier in the references and in the “Availability of Data and Materials” section of your manuscript.</p> <p>Have you have met the above requirement as detailed in our <a href="#">Minimum Standards Reporting Checklist</a>?</p> | <p>Yes</p> |

1 **Genome sequence and genetic diversity analysis of an under-domesticated orphan crop,**  
2 **white fonio (*Digitaria exilis*)**

3  
4 Xuewen Wang<sup>1,\*</sup>, Shiyu Chen<sup>2,\*</sup>, Xiao Ma<sup>3,\*</sup>, Anna E. J. Yssel<sup>4,5</sup>, Srinivasa R. Chaluvadi<sup>1</sup>,  
5 Matthew S. Johnson<sup>6</sup>, Prakash Gangashetty<sup>7</sup>, Falalou Hamidou<sup>7</sup>, Moussa D. Sanogo<sup>8</sup>, Arthur  
6 Zwaenepoel<sup>3</sup>, Jason Wallace<sup>9</sup>, Yves Van de Peer<sup>3,4,10</sup> Jeffrey L. Bennetzen<sup>1</sup>, and Allen Van  
7 Deynze<sup>2#</sup>.

8  
9 <sup>1</sup>Department of Genetics, University of Georgia, Athens, GA 30602 USA,

10 <sup>2</sup>Department of Plant Sciences, Seed Biotechnology Center, University of California, Davis, CA  
11 95616 USA,

12 <sup>3</sup>Department of Plant Biotechnology and Bioinformatics, Ghent University, Ghent, Belgium VIB  
13 - UGent Center for Plant Systems Biology, Technologiepark 71, Ghent, Belgium,

14 <sup>4</sup>Centre for Microbial Ecology and Genomics, Department of Biochemistry, Genetics and  
15 Microbiology, University of Pretoria, Pretoria 0028, South Africa,

16 <sup>5</sup>Centre for Bioinformatics and Computational Biology, Department of Biochemistry, Genetics  
17 and Microbiology, University of Pretoria, Pretoria 0028, South Africa,

18 <sup>6</sup>Institute of Plant Breeding, Genetics, and Genomics, University of Georgia, Athens, GA 30602  
19 USA,

20 <sup>7</sup>International Crops Research Institute for the Semi-Arid Tropics (ICRISAT), BP 12404,  
21 Niamey, Niger,

22 <sup>8</sup>Institut d'Economie Rurale, Ministere de l'Agriculture, Cinzana, BP 214, Ségou, Mali

23 <sup>9</sup>Department of Crop and Soil Sciences, University of Georgia, Athens, GA 30602 USA,

24 <sup>10</sup>College of Horticulture, Nanjing Agricultural University, Nanjing, China.

25  
26  
27 \*These authors contributed equally to this work.

28 #corresponding author. [avandeynze@ucdavis.edu](mailto:avandeynze@ucdavis.edu). Ph: +1 (530) 304-9329

29  
30 **ORCID:**



| Name                 | ORCID ID            |
|----------------------|---------------------|
| Xuewen Wang          | 0000-0003-2820-9255 |
| Shiyu Chen           | 0000-0003-0102-8112 |
| Xiao Ma              | 0000-0003-4787-9318 |
| Anna. E. J. Yssel    | 0000-0003-1165-3237 |
| Srinivasa Chaluvadi  | 0000-0003-2865-4156 |
| Matthew S. Johnson   | 0000-0002-1786-103X |
| Prakash Gangashetty  | 0000-0002-6766-1415 |
| Falalou Hamidou      | 0000-0002-7171-1497 |
| Moussa D. Sanogo     | 0000-0003-4617-1756 |
| Arthur Zwaenepoel    | 0000-0003-1085-2912 |
| Jason Wallace        | 0000-0002-8937-6543 |
| Yves Van De Peer     | 0000-0003-4327-3730 |
| Jeffrey L. Bennetzen | 0000-0003-1762-8307 |
| Allen Van Deynze     | 0000-0002-2093-0577 |

31

32

33 **Abstract**

34 **Background:** *Digitaria exilis*, white fonio, is a minor but vital crop of West Africa that is valued  
35 for its resilience in hot, dry and low fertility environments and for the exceptional quality of its  
36 grain for human nutrition. The crop is plagued, however, by a low degree of plant breeding and  
37 improvement.

38 **Findings:** We sequenced the fonio genome with long-read SMRT-cell technology, yielding a  
39 ~761 Mb assembly in 3329 contigs (N50 1.73 Mb, L50 126). The assembly approaches a high  
40 level of completion, with a BUSCO score of greater than 99%. The fonio genome was found to  
41 be a tetraploid, with most of the genome retained as homoeologous duplications that differ  
42 overall by ~4.3%, neglecting indels. The two genomes within fonio were found to have begun  
43 their independent divergence ~3.1 million years ago. The repeat content (>49%) is fairly  
44 standard for a grass genome of this size, but the ratio of *Gypsy* to *Copia* LTR-retrotransposons  
45 (~6.7) was found to be exceptionally high. Several genes related to future improvement of the  
46 crop were identified including shattering, plant height and grain size. Analysis of fonio  
47 population genetics, primarily in Mali, indicated that the crop has extensive genetic diversity that  
48 is largely partitioned across a north-south gradient coinciding with the Sahel and Sudan  
49 grassland domains.

50 **Conclusions:** We provide a high-quality assembly, annotation and diversity analysis for a vital

51 African crop. The availability of this information should empower future research into further  
52 domestication and improvement of fonio.

53

54 **Key Words:** domestication, gene amplification, gene loss, millet, polyploidy

55

## 56 **Data Description**

57

## 58 **Background information**

59 White fonio (*Digitaria exilis*, NCBI:txid1010633) is a vital cereal crop of West Africa, where it  
60 is commonly known as fonio or acha. A related *Digitaria* species, black fonio (*D. iburura*), is a  
61 very minor crop, mostly of Nigeria, Benin and Togo. Fonio (*D. exilis*) has an exceptionally small  
62 but very nutritious grain, with both high protein and high dietary fiber content [1-3]. Fonio can  
63 mature in as little as eight weeks after planting, and is commonly grown without fertilizer or  
64 irrigation on poor quality soils in dry regions of the Sudan grasslands and Sahel. Although yields  
65 are low, the West African crop is harvested in early summer, where it fills a vital dietary gap  
66 before the maturation of sorghum or pearl millet crops in the same region. Perhaps no other crop  
67 deserves the title “orphan” more, because research attention on fonio has been minimal [4].

68 Wild *D. exilis* (sometimes called “hungry rice”) and other West African *Digitaria* have  
69 been harvested by farmers in times of famine throughout recorded history[4], but very little  
70 improvement has been made to the domesticated crop, at least partly evidenced by the fact that  
71 no controlled cross between fonio varieties has been substantiated. Fonio was probably  
72 domesticated in West Africa, presumably before the arrival of pearl millet or sorghum from  
73 Central and East Africa [5], as is suggested by the importance of fonio in Dogon and other  
74 creation myths [4]. Applying the term “domesticated” to fonio cultivars is, however, something  
75 of a stretch. Fonio cultivars do not exhibit the full set of domestication traits, in that they exhibit  
76 the shattering (grain release at maturity) and day-length dependence traits that have been selected  
77 against by early farmers across virtually all cereal crops [6, 7]. The selected mutations to non-  
78 shattering and daylength independence are routinely recessive, so the absence of these  
79 agricultural improvements may be an outcome of the polyploid nature of the fonio genome [8].

80 As an orphan crop, fonio has received very little research attention. Over the last 20  
81 years, for instance, only nine refereed publications report any new investigation of any aspect of  
82 fonio biology, although an additional 30 plus publications in that time period investigated fonio  
83 agronomy, cultural significance or nutritional properties [9, 10]. In 2007, Adoukonou-Sagbadja  
84 and colleagues [11] published a DNA marker-based analysis of fonio genetic diversity, and there  
85 is some transcript sequence data at NCBI [12]. Beyond this, most fonio investigations have been

86 conducted in West Africa to determine appropriate conditions for subsistence farmers to grow  
87 and/or process the grain from local landraces. In contrast, several other orphan cereal crops of  
88 Africa and Asia have begun to receive extensive attention, including comprehensive analyses of  
89 germplasm resources, even to the extent of full genome sequence analysis. Three of these cereals  
90 with relatively deep recent analyses are, like fonio, panicoid grasses: foxtail millet (*Setaria*  
91 *italica*), pearl millet (*Cenchrus americanus*) and proso millet (*Panicum miliaceum*) [13-15].  
92 With these panicoid grass resources, and a comparative genomics strategy [16], it should be  
93 possible to rapidly elevate fonio research to benefit fonio consumers and producers. This  
94 manuscript describes our genomic sequence analysis of the fonio landrace Niatia, and a genetic  
95 comparison of fonio germplasms from across West Africa.

96

#### 97 **Plant material and nucleic acid preparation**

98 Fonio millet (cv. Niatia) seed were obtained from Dr. Sara Patterson (University of Wisconsin,  
99 USA) which was collected in Mali at GPS coordinates 3.9861 W, 17.5739 N. Niatia is a popular  
100 local variety in Mali [17] (see Genetic Diversity for Nagoya protocol and germplasm access).  
101 The seed were multiplied in a University of Georgia greenhouse. Seeds collected from a single  
102 plant were used for all DNA isolation. The seeds were surface sterilized with 8% sodium  
103 hypochlorite (Bioworld, United States) for 10 min, followed by three rinses with sterile distilled  
104 water. The plants were grown in standard potting soil (Fafard® 4M Sungro Professional  
105 Growing Mix (Sungro Horticulture, USA) in a greenhouse (with 14 h daylight and day/night  
106 temperatures of 26/20°C). They were watered daily to ~70% soil water-holding capacity. The  
107 leaves of four-week-old plants were used for DNA isolation, using a previously described  
108 protocol [18]. Briefly, leaf tissue (2.5g) was ground in liquid nitrogen. After lysing in 15 ml of  
109 2X extraction buffer (100 mM Tris-HCl pH 8.0, 1.4 M NaCl, 20 mM EDTA, 2% w/v CTAB  
110 with 10 µl/ml β-mercaptoethanol) and extracted with chloroform/isoamyl alcohol twice, the  
111 aqueous phase was then transferred to 3 to 3.5 volumes of precipitation buffer (50 mM Tris-HCl  
112 pH 8.0, 10 mM EDTA, 1% w/v CTAB). The sample was incubated overnight at room  
113 temperature to precipitate the DNA. After centrifugation at 3500 rpm for 15 min., the DNA  
114 pellet was washed with ddH<sub>2</sub>O and centrifuged for 10 min. Then, 5 ml of 1.5 M NaCl and 6 µl of  
115 10 mg/ml RNaseA was added to the pellet and incubated at 37°C until completely re-suspended.  
116 A chloroform extraction was performed as above to remove RNaseA and any additional

117 contaminants. The aqueous phase was collected and DNA was precipitated and washed with  
118 ethanol. The pellet was then re-suspended in 100 µl ddH<sub>2</sub>O.

119

### 120 **PacBio SMRT sequencing, sequence polishing and genome assembly**

121 DNA samples were used to construct a PacBio (Pacific Biosciences, Menlo Park, USA) SMRT  
122 sequencing library according to manufacturer recommendations at the University of California at  
123 Davis Genome Center. Fragments >10 kb were selected for sequencing via BluePippen (Sage  
124 Science, LLC, Beverly, USA). A total of 88 Gb of raw PacBio reads from 76 SMRT cells were  
125 passed through the secondary analysis pipeline in SMRT Link (v6.0, [19]) and filtered for read  
126 quality higher than 0.75 and length longer than 1 kb. The resultant 75 Gb of filtered reads were  
127 assembled in Canu (v1.8, RRID:SCR\_015880, [20]) with the default settings for raw PacBio  
128 reads.

129 Racon (Racon, RRID:SCR\_017642) was used to polish the original assembly for two  
130 rounds with the Canu-corrected PacBio reads. Sequentially, Arrow (VariantCaller v2.3.3) and  
131 Pilon (v1.23, RRID:SCR\_014731) were used to further polish the assembly with 36 Gb of  
132 Illumina paired-end reads obtained on the HiSeq4000 (RRID:SCR\_016386) at the Georgia  
133 Genomics and Bioinformatics Core at the University of Georgia.

134 The final assembly (Niatia v1.0) has a total length of 760.66 Mb and 3329 contigs, with  
135 N50 of 1.73 Mb (L50 of 126) and N90 of 75.85 kb (L90 of 889). The longest contig is 10.17 Mb  
136 and the shortest contig is 1013 bp with a mean of 228.5 kb. We compare the quality of the our  
137 genome with that of CM05836 [21] which was assembled using short-reads, linked reads and Hi-  
138 C. Although scaffold size is larger for the aforementioned genome, our genome has much better  
139 contiguity than CM05836 [21] as seen by N50 (1,734 kb vs 78 kb) and L50 (8 vs 2,624). (Suppl  
140 **Table 1**). Scaffolding is expected to be higher in the latter genome as Hi-C technology was used  
141 that associates contigs on the same histone protein regardless of their size, but the Niatia genome  
142 shows much greater contiguity. In order to see the high contiguity in our genome assembly in  
143 detail, we took two of our medium sized contigs (tig00001331 and tig00010942) as examples  
144 showing a dramatic improvement in contiguity in our genome, emphasizing the importance of  
145 long reads on assembly and annotation (see Annotation below). This is further exemplified by  
146 comparing two random medium sized contigs, tig00001331 corresponding to 100 consecutive

147 segments anchored on the same chromosome 3B and tig00010942 corresponding to 65  
148 consecutive segments on the chromosome 5A of the CM05836 [21] genome (**Suppl Fig. 1**).

149  
150

### 151 **Estimation of genome size and heterozygosity**

152 Kmer Analysis Toolkits [22] was used to count kmers in Illumina raw reads and to compare the  
153 results with the kmers counted from the genome assembly at several different kmer sizes, from  
154 17-30. These all yielded similar results, but with a somewhat larger fonio genome predicted at  
155 smaller kmer lengths. The distribution of kmer counts was modeled and the heterozygosity level  
156 was estimated using GenomeScope2.0 [23].

157 Two distinct peaks were observed in the raw read kmer distribution. We interpret the  
158 peaks at ~50 and ~100 counts/coverage as the two subgenomes in fonio (**Suppl. Fig. S2**).  
159 Genome size estimated from the peaks was 668-707 Mb, depending on the kmer size employed.  
160 This range of values is low compared to previous results from flow cytometry that indicated a  
161 genome size range of 830-1000 Mb for a broad selection of *D. exilis* germplasm [4]. The  
162 underestimate is likely due to polyploidy confounding duplicated genes both within and among  
163 subgenomes. Single nucleotide variation was estimated to be 4.3% when comparing the A and B  
164 genomes in this tetraploid, but slightly less than 0.01% heterozygosity was observed within  
165 either the A or B genomes, as assayed by kmer allelic ratios. Kmer counts in the assembled  
166 genome suggests that the peak at 100 counts represents common sequences between the two  
167 subgenomes, and the kmers under the peak at 50 counts represent the divergent regions between  
168 the two subgenomes.

169

### 170 **Repeat annotation**

171 Repeated sequences were mined and annotated with a combination of *de novo* and homology-  
172 based methods. First, simple sequence repeats were identified and masked with GMATA [24].  
173 Long-Terminal-Repeat-Retrotransposons (LTR-RTs) were identified *de novo* using the  
174 bioinformatic tools LTR\_FINDER (LTR\_Finder, RRID:SCR\_015247) [25] and LTRharvest  
175 (LTRharvest, RRID:SCR\_018970) [26] that employ structural criteria to find intact LTR-RTs,  
176 followed by LTR\_retriever analysis [27] to minimize false positives. SINE scan (version 1.1.1)  
177 [28] was used to find small interspersed nuclear elements (SINEs), a class of retroelements, and

178 these were confirmed by manual investigation. Long interspersed nuclear elements (LINEs),  
179 another class of retroelements, were found with MGEscan-nonLTR (version 2) [29]. Small DNA  
180 transposable elements (TEs) were found with MITE Tracker [30] and HelitronScanner [31] was  
181 used to identify the DNA transposons called *Helitrons*. All of the TEs from the genome assembly  
182 were used to generate a fonio-specific TE library, with individual TE families named according  
183 to the prevalent current nomenclature system [32]. The fonio TE library was compared to the  
184 multispecies repeat repository called Repbase [33] to validate annotations, and to discover any  
185 additional candidate repeats represented in Repbase. Then, the fonio TE library was used to  
186 identify both full-length and truncated TE elements by homologous search with RepeatMasker  
187 version 4.0.7 (RepeatMasker, RRID:SCR\_012954) [34] in the genome assembly. Parameter  
188 settings were adopted from the analysis described in a previous publication [35]. The predicted  
189 insertion dates of intact LTR-RTs were calculated with LTR\_retriever (LTR\_retriever,  
190 RRID:SCR\_017623) [27]. The SSRs and TEs were masked by Ns and a TE annotation file in  
191 GFF3 format was generated for subsequent gene annotation. Types and abundances of TEs and  
192 other repeats discovered in the fonio genome are presented in **Table 1**.

193

194 **Table 1.** Summary of repeat sequence properties in the genome assembly.

| Class                | Subclass        | Type            | Number of families | Number of repeats | Length (Mb) | Percent of genome |
|----------------------|-----------------|-----------------|--------------------|-------------------|-------------|-------------------|
| Class I TEs          |                 |                 |                    |                   |             |                   |
| Retroelements        | LTR-RT          | <i>Copia</i>    | 353                | 45,194            | 22.8        | 3.0               |
|                      |                 | <i>Gypsy</i>    | 1223               | 125,773           | 153.9       | 20.2              |
|                      |                 | Other           | 824                | 90,110            | 57.8        | 7.6               |
|                      | LINE            | I               | 17                 | 3040              | 1.5         | 0.2               |
|                      | SINE            |                 | 3790               | 181,505           | 30.6        | 4.0               |
| Class II TEs         |                 |                 |                    |                   |             |                   |
| DNA Transposons      | TIR             | CACTA           | 348                | 42,737            | 7.4         | 1                 |
|                      |                 | <i>Mutator</i>  | 34                 | 8493              | 1.8         | 0.2               |
|                      |                 | PIF             | 120                | 13,973            | 2.4         | 0.3               |
|                      |                 | Tc1             | 896                | 124,252           | 21.5        | 2.8               |
|                      |                 | hAT             | 93                 | 13097             | 2.5         | 0.3               |
|                      | <i>Helitron</i> | <i>Helitron</i> | 313                | 104,271           | 21.6        | 2.8               |
| Tandem repeats       | SSRs            |                 |                    | 133,570           | 5.9         | 0.8               |
| Unclassified repeats | (Repbase)       |                 |                    |                   | 48          | 6.3               |
| Total                |                 |                 |                    |                   | 329.8       | 49.7              |

195

196 **Transcriptome assembly, candidate gene annotation and BUSCO quality assessment**

197 Illumina RNA sequencing data (paired-end 100 bp) of *Digitaria exilis* were downloaded from  
198 the NCBI Sequence Read Archive (accession number SRX1967865 [12]) from RNA consisting  
199 of ~80% inflorescence and ~20% leaf tissue. FastQC (FastQC, RRID:SCR\_014583) [36] was  
200 used to evaluate data quality, and low-quality reads and adapter sequences were removed using  
201 Trimmomatic (Trimmomatic, RRID:SCR\_011848) [37]. The remaining reads were aligned to the  
202 genome assembly using HISAT2 (HISAT2, RRID:SCR\_015530) [38]. The spliced alignments  
203 were used as input for StringTie [39] and assembled into transcripts. TransDecoder, a companion  
204 software of the Trinity platform [40], was used to predict open reading frames.

205 For gene prediction and genome annotation, we used the Maker-P pipeline [41], in  
206 combination with Augustus (Augustus, RRID:SCR\_008417) [42], SNAP [43] and GeneMark  
207 (GeneMark, RRID:SCR\_011930) [44]. Augustus gene models came from the BUSCO (BUSCO,  
208 RRID:SCR\_015008) [45] data set identified during the assembly (see below). GeneMark\_ES  
209 was used to produce *ab initio* gene predictions. Detailed settings for each round of Maker can be  
210 found in the Supplemental Methods. The first round of gene prediction with Maker used the  
211 following inputs: the RNAseq assembly described in the previous section, protein fasta  
212 sequences from *S. bicolor* and *S. italica* [46] as well as the repeat models for *Digitaria*  
213 (described above), and the soft-masked genome assembly. A second round of Maker used as  
214 input the genome file, the annotation produced by the previous round and a SNAP species  
215 parameter/hmm file based on the prior annotation. Finally, the third round of Maker was run  
216 using the following input: the genome assembly, the annotation produced by round two and the  
217 GeneMark models. Functional annotation was done using the accessory scripts of Maker as  
218 described by Campbell and coworker [47]. Briefly, a BLAST [48] search against the Swissprot  
219 database was used to assign putative functions to the newly annotated gene models, while  
220 InterProScan 5 (InterProScan, RRID:SCR\_005829) [49] was used to obtain domain information.

221 Following mapping of RNAseq data with HISAT2, 88% of the RNAseq reads could be  
222 well-aligned to the genome. Transcripts were assembled with Stringtie and ORFs were predicted  
223 with TransDecoder (TransDecoder, RRID:SCR\_017647). A total of 58,305 candidate transcripts  
224 were obtained, of which 50,389 had predicted open reading frames.

225 Our first round of Maker predicted 60,300 protein-coding genes (based only on RNA



226 evidence and protein evidence from sorghum and Setaria). After the 2nd and 3rd round, where  
227 Augustus, SNAP and Genemark-ES models were included, the number of predicted protein  
228 coding genes increased to 67,921 and finally to 68,302. We removed 447 candidate genes that  
229 were judged as spurious because they were fragments of otherwise fully assembled genes in the  
230 annotation, so the final number of genes annotated as protein coding genes is 67,855. The  
231 statistics for the gene annotation can be found in the Supplemental Materials (**Table S2**). In total,  
232 88.3% of the gene models were supported by RNAseq data. The Annotation Edit Distance  
233 (AED) measurements indicate how well an annotation agrees with overlapping evidence  
234 (protein, mRNA or EST data). In the fonio assembly, >90% of the gene models have an AED  
235 score less than 0.4%, indicating that gene models are well supported by evidence. The number of  
236 genes and gene model lengths are greater than that reported by Abrouk et al [21] for CM05836  
237 (59,844) indicating the importance of long read assemblies and contiguity in genome assembly  
238 and annotation.

239 BUSCO v 4.0.2 [45, 50] analysis of the filtered predicted protein sequences against the  
240 reference set for plants, on the gVolante platform [51], showed that 98.1% of the BUSCO genes  
241 were found as complete genes, while this representation number increased to 99.3% if partially  
242 covered BUSCO genes were added compared to the 97.2 reported by Abrouk et al.[21]. A total  
243 of 11.6% of the BUSCO genes were single copy, while 86.5% of the BUSCO genes were found  
244 in duplicate. Approximately 1.2% of the BUSCO genes were fragmented and ~0.7% were  
245 missing.

246 A total of 4,741 non-coding RNAs (see **Suppl. Table S3**) were predicted with Infernal  
247 [52] by comparing the genome fasta file with the RFAM CM database, version 14.2 [53] using  
248 the protocol described in Kalvaru et al. [54]. Most of these non-coding RNAs were found to be  
249 tRNAs (31.2%), 5S rRNAs (12.2%) and snoRNAs (23.4%), as seen in other plant genomes.

250

251

## 252 **Phylogenetic divergence and dating the most recent whole genome duplication**

253 The coding DNA sequences (CDS) and annotations for *S. bicolor* and *S. italica* were  
254 downloaded from the PLAZA database [46].  $K_S$  distribution analyses were performed using the

255 wgd package (v1.1) [47]. For each species, the paranome (entire collection of duplicated genes)  
256 was obtained with ‘wgd mcl’ using all-against-all BlastP [47] and MCL clustering [55].  $K_s$   
257 distributions were then constructed using ‘wgd ksd’ with default settings (using MAFFT for  
258 multiple sequence alignment [56], codeml for maximum likelihood estimation of pairwise  
259 synonymous distances [57], and FastTree (FastTree, RRID:SCR\_015501) [58] for inferring  
260 phylogenetic trees used in the node weighting procedure. Anchors or anchor pairs (duplicates  
261 lying in collinear or syntenic regions of the genome) were obtained using i-ADHoRe [59]  
262 employing the default settings in ‘wgd syn’.

263 We obtained gene families for a set of nine species in the Poaceae family using  
264 OrthoFinder (OrthoFinder, RRID:SCR\_017118) with default settings [60]. All sequence data  
265 were obtained from PLAZA [46]. From this set of gene families, we identified all gene families  
266 that were single-copy in all species but duplicated in *D. exilis*, and where the *D. exilis* duplicates  
267 were anchor pairs (1,967 gene families). For these gene families, we performed pre-alignment  
268 homology filtering using PREQUAL [61] and multiple sequence alignment of the masked amino  
269 acid sequences using MAFFT (MAFFT, RRID:SCR\_011811) [56]. For each multiple sequence  
270 alignment, we obtained the corresponding codon-level nucleotide alignment. For each obtained  
271 nucleotide alignment, we sampled tree topologies from the posterior using MrBayes v3.2  
272 (MrBayes, RRID:SCR\_012067) [62] under the GTR model with a discrete Gamma mixture for  
273 relative substitution rates across sites (using four classes), sampling every 10 iterations, for a  
274 total of 250,000 iterations. We then identified all gene families for which the expected species  
275 tree topology had posterior probability above 0.9, resulting in a set of 1,242 gene families. A  
276 concatenated codon alignment was obtained for these families, which was in three partitions  
277 corresponding to each codon position. We then performed posterior inference of substitution  
278 rates and divergence times for the partitioned alignment using MCMCTree [55, 63] using the  
279 multivariate Normal (MVN) approximation of the likelihood (where the MVN approximation  
280 was based on the maximum likelihood estimates under the GTR model with Gamma distributed  
281 relative rates across sites (5 categories). We used a Gamma (2, 11) prior for the mean  
282 substitution rate per site per 100 My (million years), based on a rough estimate of the  
283 substitution rate under the molecular clock with a root age of 50 My obtained using baseml from  
284 the PAML package [53]. We use an independent log-normal rates relaxed molecular clock prior  
285 on branch-specific substitution rates, using a Gamma (2, 10) prior for the variance parameter of

286 the clock. We set the birth-death-sampling prior such that a uniform prior over node ages is  
287 obtained. We include two fossil calibrations. First, we used a minimum age for the *Oryza* -  
288 *Hordeum* divergence of 34 My based on the review of Iles et al. [64]. Next, a secondary  
289 calibration for the root based on previous dating studies included in the Time Tree [65] database  
290 was used, where we excluded all time estimates younger than the 34 My constraint and older  
291 than 80 My. We then fitted a log-normal distribution to the age estimates in the time tree data,  
292 which we approximated by a Gamma (47,100) distribution. We used MCMCTree to obtain 5000  
293 from the posterior sampling every 200 iterations after a burn-in of 50,000 iterations. We  
294 compared two independent runs with each other to verify convergence and with a run of the  
295 MCMC algorithm under the prior alone to compare the posterior distribution for the node ages to  
296 the effective prior implied by the fossil calibrations (**Suppl. Fig. S3**). The results of this analysis  
297 provide the phylogenetic tree shown in **Figure 1D**.

298

### 299 **Transposable element properties**

300 The ~42.6% TE content of the fonio genome is a minimal estimate, given that degraded TE  
301 fragments are often missed by the *de novo* discovery analysis that was employed. This  
302 underestimation is routine in other plant genome annotations as well [66], so it is reasonable to  
303 compare TE descriptions across plant genomes. In fonio, the very high level of *Gypsy* LTR-RTs  
304 compared to *Copia* LTR-RTs is exceptional. Although most grass genomes have more *Gypsy*  
305 TEs than *Copia* (for instance, ~50% *Gypsy* and ~25% *Copia* in the ~2.4 Gb maize genome [67]  
306 or ~36% *Gypsy* and ~33% *Copia* in the ~2.8 Gb pearl millet genome [14], the ~6.7:1 *Gypsy* to  
307 *Copia* ratio in the ~900 Mb fonio genome is unprecedented. One should remember, however,  
308 that the diploid constituent genomes of fonio are ~450 Mb, so somewhat similar results are  
309 observed in other small panicoid genomes like sorghum (~750 Mb) and rice (~430 Mb), with  
310 *Gypsy/Copia* of ~3.7 and ~4.9, respectively [68]. This fonio observation is surprising because the  
311 quantity of *Gypsy* LTR-retrotransposons is the major determinant of genome size in grasses [69],  
312 so one would expect higher *Gypsy* to *Copia* ratios as genome size increases, rather than the  
313 opposite that we observe. These results suggest that either different factors initiate *Gypsy*  
314 amplification bursts than *Copia* amplifications, or that *Copia* elements are particularly sensitive  
315 to shared activation factors. It would be useful to investigate additional *Digitaria* species to see if

316 this *Gypsy/Copia* ratio trait is shared by other close relatives, and thus a possible outcome of  
317 common ancestral properties.

318 Analysis of LTR-RT insertion dates demonstrated that most of the elements inserted  
319 within the last 2 My. This high level of recent activity is a standard observation in the grasses, at  
320 least partly caused by the fact that the rapid DNA removal by accumulated small deletions  
321 quickly excise and otherwise obscures any DNA that is not under positive selection [70, 71].

### 322 **Whole genome duplication and subsequent stability**

323 We inferred whole-paranome and one-vs.-one ortholog  $K_S$  distributions and performed syntenic  
324 analyses to further assess the clear signature of a relatively recent whole-genome duplication  
325 (WGD) in *Digitaria exilis*.  $K_S$  distributions present a very clear signature of WGD in the recent  
326 evolutionary past of *D. exilis*, with this event not shared with the closest relative in our analyses  
327 (*S. italica*) (**Figure 1A**). We note that a trace of an older, likely Poaceae-shared WGD [72] event  
328 was also clearly observed in both the whole-paranome and anchor pair  $K_S$  distributions of *D.*  
329 *exilis*, coinciding with similar signatures in sorghum and *Setaria* (**Figure 1B**). Analysis of co-  
330 linearity and synteny show that the genome of *D. exilis* is still largely conserved in duplicate  
331 (**Figure 1C**). Phylogenetic divergence time estimation (**Figure 1D**) estimated the timing of the  
332 WGD event (or divergence of parental genomes in the case of an allopolyploidy event) at ~3.1  
333 million years ago (mya) with a 95% posterior uncertainty interval of (2.2, 4.2 My) and the  
334 divergence of *Digitaria* from *Setaria* at 17.8 (12.5, 23.1) mya; with these estimates associated  
335 with a posterior mean substitution rate across the three codon positions of  $2.5 \times 10^{-9}$  ( $1.1 \times 10^{-9}$ ,  
336  $5.0 \times 10^{-9}$ ) substitutions per year per site. This is consistent with CM05836 [21]. The closest  
337 relative to fonio with a whole genome sequences would be *Panicum miliaceum*, *S. italica* and *C.*  
338 *americanus*. The diploid ancestor to *D. exilis* is not clear [73].

340 It is interesting that **Figure 1C** shows extreme conservation of gene content and order  
341 across long scaffolds, but also the presence of large rearrangements that differentiate  
342 chromosome-size blocks. This suggests a possible selection for major rearrangements after the  
343 polyploids were formed, perhaps to minimize tetrasomic inheritance [74, 75].

344 In the ~3.1 My since the latest WGD, most of the duplicated genes have had both copies  
345 retained. For instance, the BUSCO gene set yielded 86.5% of the genes still in a duplicated state.

346 Our genome assemblies did not yield complete chromosomes, so we could not investigate the  
347 details of major chromosomal rearrangements, preferential gene loss (also known as  
348 fractionation), or parent-specific gene expression differences that might differentiate the two  
349 ancestral genomes in this tetraploid [76]. The large stretches of gene content and gene  
350 collinearity retention observed between our largest contiguous assemblies (**Figure 1C**) do  
351 demonstrate, however, that there has been no large number of small rearrangements of these  
352 genomes over the last 3.1 My.

### 353 **Expansions and contraction of gene families**

354 In order to see the expansions and contractions of gene families, broomcorn millet (*Panicum*  
355 *miliaceum* L.) was added in the phylogenetic analysis, as it experienced a recent tetraploidization  
356 estimated at ~5.8 MYA that is similar to fonio.

357 Based on sequence homology, we assigned 58,459 genes to 20,003 families, 14,549 of  
358 which have expanded in the fonio genome. Expansion in a similar number of gene families  
359 (11,819) was also observed in the broomcorn millet genome, also an allotetraploid crop. Of the  
360 fonio gene families, 57.4% contain two copies (the most abundant category in these ten species)  
361 and 30.4% contain more than two copies (**Figure 2**). Most (~90%) of the two-copy gene families  
362 of fonio are located in syntenic blocks, indicating that the expansion was mainly due to the  
363 recent WGD event (**Figure 2** and **Suppl. Fig. S4**).

364 In addition to the majority of multi-copies genes, there are many (~12.1% of the total)  
365 that are single-copy genes, and thus a likely outcome of at least some deletion after polyploidy.  
366 GO enrichment analyses of contracted genes (1 copy **Suppl. Fig. S5**) and expanded genes (>2  
367 copies, **Suppl Fig. S6**) relative to *O. sativa* were performed. The analyses identifies negative  
368 regulators and recognition factors for biotic and abiotic stresses, as well pollen/fertility  
369 recognition as single copy genes. In contrast, there is general expansion of gene families  
370 encoding positive regulators of multiple copy genes. These results suggest that further analysis  
371 of these genes may reveal their roles in heat and drought stress tolerance, and in understanding of  
372 crossing barriers in fonio.

### 373 374 **Candidate domestication genes**

375 Improvement of fonio will require further domestication, particularly to solve the issues of  
376 shattering and lodging. This process should be greatly assisted by the provision of a  
377 comprehensive genome sequence.

378 In rice, sorghum and maize, mutations in the gene SSH1 (SUPPRESSION of SEED  
379 SHATTERING-1) are associated with panicle retention of the grain after seed maturation (the  
380 “non-shattering” trait) in domesticated accessions [77]. Nine sequenced grass genomes were  
381 scanned with OrthoFinder (as described in the section “Phylogenetic divergence and dating the  
382 most recent whole genome duplication”) to find the orthologues of this gene. The gene family  
383 fasta files were used to construct trees using Mafft and Iqtree, trees were visualized in FigTree.  
384 Interproscan was used to annotate the proteins with their pFam domains, and alignments were  
385 visualized in Geneious Prime [78].

386 Fonio has 4 genes related to SSH1, but the phylogenetic tree indicated that two are more  
387 closely related to the rice SSH1 gene associated with shattering than to the other SSH1-like gene  
388 in rice (**Suppl. Fig. S7**). Other species included in our dataset have between 1 and 3 SSH1-like  
389 genes (**Suppl. Table S4**). The extra copies in *D. exilis* are expected because of its polyploid  
390 nature, and thus can explain why no ancient or modern farmers have detected recessive single  
391 gene mutations at each of these loci in a single fonio plant. By modern forward or reverse genetic  
392 and breeding techniques, inactivation and selection of both of these genes should be targeted in  
393 order to solve the shattering problem in fonio.

394 Inactivation of the *dw3* (Dwarfing-3) genes of sorghum is responsible for the semi-dwarf  
395 trait that diminishes lodging and thereby greatly improves yield and input response in this  
396 important crop of arid and semi-arid agriculture [79]. Inactivation-mutant orthologues of the  
397 same gene are also responsible for the pearl millet cultivars with highest lodging resistance and  
398 the highest grain yield [80]. Hence, orthologues of *dw3* also should be targets for inactivation-  
399 mutation and molecular breeding in fonio. Once again, fonio has more copies of this gene than  
400 do any of the other grasses screened, all of which are diploids (**Suppl. Fig. S8 and Table S5**).

401 The GW2 (GRAIN WEIGHT-2) gene controls seed weight in wheat and rice, with  
402 inactivation of the gene leading to larger grain [81, 82]. Orthofinder results indicated that  
403 members of this gene family are present in single copy in all of the examined grass species,  
404 except fonio and maize (**Suppl. Fig. S9 and Table S6**). The two copies in *D. exilis* only differ  
405 from each other by 3 amino acid residue substitutions. The fonio genes were found to be nearly

406 identical to the unmutated GW2 version that yields smaller grain in rice and wheat (data not  
407 shown). Although increased seed weight does not always increase yield (due to correlated traits,  
408 like seed number), it is a particularly important trait in fonio to enable sowing for uniform stands  
409 and mechanical threshing.

410

### 411 **Genetic diversity**

412 Fonio genetic diversity was assessed using 184 samples from ~130 accessions collected  
413 from Mali and Niger, signatories to the Cartagena Protocol on Biosafety (**Suppl. Table S7**).  
414 Consistent with the Nagoya Protocol and the third objective of the Convention on Biological  
415 Diversity of access and benefit sharing, fonio materials from Mali were collected in Mali by  
416 Institut d’Economie Rural (IER) while those from Niger were collected in Niger by Institute  
417 National de Recherche Agronomique du Niger (INRAN) and conserved at the ICRISAT Niamey  
418 genebank. Authors Sanogo, Hamidou and Gangashetty were involved in the germplasm  
419 collection, seed conservation at the genebank and/or DNA extraction from young seedlings. All  
420 DNA samples or seed were sent to the USA for analysis for research purposes only. This  
421 research has no direct commercial application.

422 Seedlings of each sample were grown at the respective institutions in West Africa, and  
423 DNA was extracted from young leaves with a QIAGEN DNeasy Plant Mini Kit (Germantown,  
424 USA). Lyophilized DNA was then sent to Data2Bio (Ames, USA) for tunable genotyping-by-  
425 sequencing (tGBS) using 2-bp selection and 5 runs on an Ion Torrent Ion Proton Instrument  
426 (Thermo Fisher Scientific, Waltham, USA). The resulting raw sequences were quality-trimmed  
427 by Data2Bio, which removed bases with PHRED quality scores <15. These trimmed sequences  
428 were then aligned to the genome assembly with GSNAP v2020-04-08 [83] using default  
429 parameters. SNPs were called using the bcftools mpileup command v1.9 [84] with max-depth set  
430 to 1000 and minimum base quality set to 20. Raw SNPs were then filtered using TASSEL  
431 v5.2.40 [85], custom R scripts with R v3.5.1 [86], and bcftools to include only sites with  $\leq 25\%$   
432 heterozygosity,  $\leq 500$  total read depth,  $\leq 60\%$  missing data, and  $\geq 2.5\%$  minor allele frequency  
433 (**Suppl. Table S8**). Population substructure was determined with fastStructure v1.0 [87], testing  
434 from 1 to 10 population clusters and identifying the optimal number with the included  
435 chooseK.py program. This identified 3 clear clusters of material, with genetic separation strongly  
436 correlated with geography (**Figure 3A**). The genetic distinctions among these clusters are clear

437 when plotting the genetic principal coordinates and relationship dendrogram (**Figure 3B**). A  
438 small number of accessions (<5) appear “misplaced” on the geographic map, which could be due  
439 to recent transfer of germplasm or human error during collection, storage, or processing.  
440 Geographic clustering can reflect both human trafficking of seed stocks and the genetic basis of  
441 local adaptation. Further (both broader and deeper) germplasm analyses will be useful for  
442 resolving these issues.

443

#### 444 **Conclusions**

445 Genome analysis of any polyploid is challenging, especially when no diploid ancestors are  
446 known. Our sequence of the white fonio (*D. exilis*) genome indicates its recent tetraploid origin  
447 and the retention of most of the genes duplicated in this process. This retention of duplicated  
448 genes likely explains why recessive mutations for important agronomic traits like shattering,  
449 seed size, semi-dwarfism and others like day-length dependence have not yet been detected in  
450 fonio. However, it is now possible to identify such mutations by using modern mutation  
451 detection schemes, like those used for the tetraploid cereal *Eragrostis tef* [88]. One purpose for  
452 generating a fonio genome sequence was to attract molecular genetics researchers into the study  
453 of this crop, and thereby enable hypothesis-driven breeding through genomics-assisted selection.  
454 If future researchers develop a transformation technology for fonio [89] or develop other genome  
455 editing strategies [90], then directed mutagenesis could be used to knock out pairs of these  
456 domestication genes in a single step [91].

457         The importance of correcting such problems as shattering, seed size, lodging in fonio  
458 cannot be overestimated. Until shattering is solved, farmers will continue to be required to  
459 harvest before grains fully mature, thus dramatically decreasing overall yield. Without semi-  
460 dwarf varieties, already serious lodging problems in fonio will continue to prohibit the use of  
461 more inputs (because fertilizer increases plant height and thus lodging) or even the selection of  
462 larger grain yield from the panicles, because greater weight on the top of the plant can cause  
463 more lodging. The same will almost certainly be true for fonio, hence providing a partial  
464 explanation for its tiny seed size in cultivated landraces. With domestication traits fully penetrant  
465 into fonio cultivars, one can expect dramatic increases in fonio performance, with expectations  
466 of a two-fold or greater yield enhancement easily within the short-term range of possibilities.



467           The absence of an outcrossing protocol for fonio is another technical deficiency that  
468 severely limits this crop's potential for improvement. Our diversity analysis on cultivar Niatia  
469 indicates <0.01% heterozygosity, showing that crosses occur very rarely by natural processes.  
470 Hence, generating controlled crosses will probably require a serious dedication to this pursuit.  
471 Our results indicate a great deal of genetic variability within fonio landraces, so we have no  
472 doubt that hybridization could be used in breeding projects to optimize fonio germplasm quality  
473 for future W. African and other farmers.

474

#### 475 **Availability of Supporting Data**

476           The genome and annotation can be accessed on the African Orphan Crops Consortium-  
477 specific branch of the ORCAE platform [92, 93] at: [94]. The GenBank project number for the  
478 assembly is PRJNA640067. All scripts for diversity analysis and data tables are available at [95]  
479 including full genotyping table. Genotyping table is also available at GenBank Project number  
480 PRJNA644458. All supporting data and materials are available at *GigaScience* GigaDB database  
481 [96].

482

#### 483 **Abbreviations**

484

485 Dw3: dwarf3; Gb: gigabase; GW2: grain weight2; LINE: long interspersed nuclear element;  
486 LTR: long terminal repeat; LTR-RT: long terminal repeat retrotransposon; Mb: megabase;  
487 MITE: miniature inverted repeat transposable element; My: million years; mya: million years  
488 ago; NCBI: National Center for Biotechnology Information; ORF: open reading frame; SINE:  
489 small interspersed nuclear element; SMRT: single molecule, real time sequencing; SSH1:  
490 suppression of shattering1; SSR: simple sequence repeat; TE: transposable element; TIR:  
491 terminal inverted repeat transposable element.

492

#### 493 **Conflict of Interest**

494

495 The authors declare that they have no competing interests.

496

497 **Consent for publication**

498 Not Applicable

499

500 **Funding**

501

502 JLB acknowledges the Giles Fellowship from the University of Georgia as a source of funding for  
503 this project. YVdP acknowledges funding from the European Research Council (ERC) under the  
504 European Union’s Horizon 2020 research and innovation program (grant agreement No 833522).  
505 AV acknowledges funding from the Seed Biotechnology Center, University of California, USA.  
506 JGW acknowledges funding from the International Crops Research Institute for the Semi-Arid  
507 Tropics (ICRISAT) and the University of Georgia. MDS acknowledges funding from the  
508 McKnight foundation.

509

510 **Author Contributions**

511

512 J.L.B., J.W., Y.V., and A.V.D. conceived, designed and interpreted the study; S.C., X.M., X. W.,  
513 A.E.J.Y., S.R.C., M.S.J., P.G., F.H., M.D.S., and A.Z. prepared the materials, conducted the  
514 experiments, and analyzed all data; J.L.B. and A.V. led on manuscript preparation, while all  
515 other authors revised the manuscript and approved the final version.

516

517 **Acknowledgements:**

518

519 Shu-Min Kao for providing scripts and Sara Patterson for providing Niatia seed and for helpful  
520 discussions. Oanh Nguyen from the UC Davis Genome and Biomedical Sciences Facility for technical  
521 expertise for sequencing with Pacific Biosciences. Armando Garcia-Llanos for DNA and library quality  
522 control for sequencing.

523

524 **Figure Legends**

525

526 **Figure 1:** Whole genome duplication and polyploidy analysis. (A)  $K_S$  estimation of age  
527 distribution for paralogs and orthologs of white fonio (*Digitaria*) and some close relatives. The  
528 distribution in light pink represents the entire white fonio paronome, while the distribution in  
529 darker pink represents the anchor points (duplicated genes lying in syntenic or collinear regions  
530 (see C)). Distributions in black, dark green and light green represent the one-vs.-one ortholog  
531 comparisons between *Digitaria-Setaria*, *Digitaria-Sorghum* and *Sorghum-Setaria*, respectively.  
532 (B)  $K_S$  distributions for paralogs of white fonio, sorghum and *Setaria* (zoom in), showing an  
533 older, likely Poaceae-shared, WGD. (C) Syntenic relationships between putative homoeologous  
534 contigs, with colored lines connecting homoeologous gene pairs in the white fonio genome  
535 assembly. (D) Time-calibrated phylogenetic tree of several major Poaceae lineages, including  
536 white fonio, based on 1242 gene families consisting of a single gene copy in each lineage and an  
537 anchor pair (A and B) in *Digitaria*. The time scale is shown in million years (My). See text for  
538 details.

539  
540 **Figure 2** The number of gene families that expanded or contracted during evolution mapped to  
541 the species phylogenetic tree in related Poaceae species.

542  
543 **Figure 3 – Fonio Genetic Diversity.** The genetic diversity of fonio samples was surveyed by  
544 genotyping-by-sequencing. (A) Fonio samples originated from Mali and Niger. They separate  
545 into 3 primary subpopulations based on population structure analysis. Both principal coordinate  
546 analysis of the genetic diversity (B) and a neighbor-joining tree of the population (C) confirm  
547 these groupings. A few discrepancies between population assignment and geography may be due  
548 to recent long-distance germplasm exchanges or labelling errors during collection and storage.

## 549 **References**

- 551 1. Ballogou V, Soumanou M, Toukourou F and Hounhouigan J. Structure and nutritional  
552 composition of fonio (*Digitaria exilis*) grains: a review. International Research Journal of  
553 Biological Sciences. 2013;2 1:73-9.
- 554 2. Fanou N, Hulshof P, Koreissi Y and Brouwer I. NUTRITIVE VALUES OF FONIO  
555 AND FONIO PRODUCTS: P110-08. Annals of Nutrition and Metabolism. 2009;55.
- 556 3. Temple VJ and Bassa JD. Proximate chemical composition of Acha (*Digitaria exilis*)  
557 grain. J Sci Food Agr. 1991;56 4:561-3.
- 558 4. Vietmeyer N, Borlaugh N, Axtell J, Burton G, Harlan J and K R. Fonio (Acha). Lost  
559 Crops of Africa. Washington, DC: The National Academies Press; 1996. p. 59.

- 560 5. De Wet J. The three phases of cereal domestication. *Grass evolution and domestication*.  
561 1992:176-98.
- 562 6. Aliero A and Morakinyo J. Photoperiodism in *Digitaria exilis* (Kipp) Stapf accessions.  
563 *African journal of biotechnology*. 2005;4 2:241-3.
- 564 7. Patterson SE, Bolivar-Medina JL, Falbel TG, Hedtcke JL, Nevarez-McBride D, Maule  
565 AF, et al. Are we on the right track: can our understanding of abscission in model  
566 systems promote or derail making improvements in less studied crops? *Frontiers in plant*  
567 *science*. 2016;6:1268.
- 568 8. Adoukonou-Sagbadja H, Schubert V, Dansi A, Jovtchev G, Meister A, Pistrick K, et al.  
569 Flow cytometric analysis reveals different nuclear DNA contents in cultivated Fonio  
570 (*Digitaria* spp.) and some wild relatives from West-Africa. *Plant Syst Evol*. 2007;267  
571 1:163-76. doi:10.1007/s00606-007-0552-z.
- 572 9. Chukwurah PN, Uyoh EA, Usen IN, Ekerette EE and Ogbonna NC. Assessment of intra  
573 and inter species variation in antioxidant composition and activity in marginalized Fonio  
574 millet (*Digitaria* spp.). *Journal of Cereals and Oilseeds*. 2016;7 1:1-6.
- 575 10. Gigou J, Stilmant D, Diallo TA, Cisse N, Sanogo MD, Vaksman M, et al. Fonio millet  
576 (*Digitaria exilis*) response to N, P and K fertilizers under varying climatic conditions in  
577 West Africa. *Exp Agr*. 2009;45 4:401-15.
- 578 11. Adoukonou-Sagbadja H, Wagner C, Dansi A, Ahlemeyer J, Daïnou O, Akpagana K, et  
579 al. Genetic diversity and population differentiation of traditional fonio millet (*Digitaria*  
580 spp.) landraces from different agro-ecological zones of West Africa. *Theoretical and*  
581 *Applied Genetics*. 2007;115 7:917-31.
- 582 12. Sarah G, Homa F, Pointet S, Contreras S, Sabot F, Nabholz B, et al. A large set of 26 new  
583 reference transcriptomes dedicated to comparative population genomics in crops and wild  
584 relatives. *Mol Ecol Resour*. 2017;17 3:565-80. doi:10.1111/1755-0998.12587.
- 585 13. Bennetzen JL, Schmutz J, Wang H, Percifield R, Hawkins J, Pontaroli AC, et al.  
586 Reference genome sequence of the model plant *Setaria*. *Nature biotechnology*. 2012;30  
587 6:555-61.
- 588 14. Varshney RK, Shi C, Thudi M, Mariac C, Wallace J, Qi P, et al. Pearl millet genome  
589 sequence provides a resource to improve agronomic traits in arid environments. *Nature*  
590 *biotechnology*. 2017;35 10:969-76.
- 591 15. Zou C, Li L, Miki D, Li D, Tang Q, Xiao L, et al. The genome of broomcorn millet.  
592 *Nature communications*. 2019;10 1:1-11.
- 593 16. Bennetzen JL and Freeling M. The unified grass genome: synergy in synteny. *Genome*  
594 *research*. 1997;7 4:301-6.
- 595 17. Cruz J-F. Fonio. Upgrading quality and competitiveness of fonio for improved  
596 livelihoods in West Africa: Second activity report. 2008.
- 597 18. Murray M and Thompson WF. Rapid isolation of high molecular weight plant DNA.  
598 *Nucleic acids research*. 1980;8 19:4321-6.
- 599 19. Pacific Biosciences: Software Downloads. SMRT Link V 6.0.  
600 <https://www.pacb.com/support/software-downloads> (2020). Accessed June 21, 2020  
601 2020.
- 602 20. Koren S, Walenz BP, Berlin K, Miller JR, Bergman NH and Phillippy AM. Canu:  
603 scalable and accurate long-read assembly via adaptive k-mer weighting and repeat  
604 separation. 2017; doi:10.1101/gr.215087.116.

- 605 21. Abrouk M, Ahmed HI, Cubry P, Šimoníková D, Cauet S, Pailles Y, et al. Fonio millet  
606 genome unlocks African orphan crop diversity for agriculture in a changing climate.  
607 Nature Communications. 2020;11 1 doi:10.1038/s41467-020-18329-4.
- 608 22. Mapleson D, Garcia Accinelli G, Kettleborough G, Wright J and Clavijo BJ. KAT: a K-  
609 mer analysis toolkit to quality control NGS datasets and genome assemblies.  
610 Bioinformatics (Oxford, England). 2017;33 4:574-6.
- 611 23. Ranallo-Benavidez TR, Jaron KS and Schatz MC. GenomeScope 2.0 and Smudgeplot for  
612 reference-free profiling of polyploid genomes. Nature Communications. 2020;11 1:1432.  
613 doi:10.1038/s41467-020-14998-3.
- 614 24. Wang X and Wang L. GMATA: an integrated software package for genome-scale SSR  
615 mining, marker development and viewing. Frontiers in plant science. 2016;7:1350.
- 616 25. Xu Z and Wang H. LTR\_FINDER: an efficient tool for the prediction of full-length LTR  
617 retrotransposons. Nucleic acids research. 2007;35 suppl\_2:W265-W8.
- 618 26. Ellinghaus D, Kurtz S and Willhoeft U. LTRharvest, an efficient and flexible software for  
619 de novo detection of LTR retrotransposons. BMC bioinformatics. 2008;9 1:18.
- 620 27. Ou S and Jiang N. LTR\_retriever: a highly accurate and sensitive program for  
621 identification of long terminal repeat retrotransposons. Plant physiology. 2018;176  
622 2:1410-22.
- 623 28. Mao H and Wang H. SINE\_scan: an efficient tool to discover short interspersed nuclear  
624 elements (SINEs) in large-scale genomic datasets. Bioinformatics (Oxford, England).  
625 2017;33 5:743-5.
- 626 29. Rho M and Tang H. MGEScan-non-LTR: computational identification and classification  
627 of autonomous non-LTR retrotransposons in eukaryotic genomes. Nucleic acids research.  
628 2009;37 21:e143-e.
- 629 30. Crescente JM, Zavallo D, Helguera M and Vanzetti LS. MITE Tracker: an accurate  
630 approach to identify miniature inverted-repeat transposable elements in large genomes.  
631 BMC bioinformatics. 2018;19 1:348.
- 632 31. Xiong W, He L, Lai J, Dooner HK and Du C. HelitronScanner uncovers a large  
633 overlooked cache of Helitron transposons in many plant genomes. Proceedings of the  
634 National Academy of Sciences. 2014;111 28:10263-8.
- 635 32. Wicker T, Sabot F, Hua-Van A, Bennetzen JL, Capy P, Chalhoub B, et al. A unified  
636 classification system for eukaryotic transposable elements. Nat Rev Genet. 2007;8  
637 12:973-82.
- 638 33. Jurka J, Kapitonov VV, Pavlicek A, Klonowski P, Kohany O and Walichiewicz J.  
639 Repbase Update, a database of eukaryotic repetitive elements. Cytogenetic and genome  
640 research. 2005;110 1-4:462-7.
- 641 34. RepeatMasker version 4.0.7. <http://www.repeatmasker.org/>. Accessed March 15 2020.
- 642 35. Luo M-C, Gu YQ, Puiu D, Wang H, Twardziok SO, Deal KR, et al. Genome sequence of  
643 the progenitor of the wheat D genome *Aegilops tauschii*. Nature. 2017;551 7681:498-  
644 502.
- 645 36. Andrews S: FastQC a quality control tool for high throughput sequence data. [https://www](https://www.bioinformatics.babraham.ac.uk/projects/fastqc/)  
646 [bioinformatics.babraham.ac.uk/projects/fastqc/](https://www.bioinformatics.babraham.ac.uk/projects/fastqc/). Accessed June 19 2020.
- 647 37. Bolger AM, Lohse M and Usadel B. Trimmomatic: a flexible trimmer for Illumina  
648 sequence data. Bioinformatics (Oxford, England). 2014;30 15:2114-20.
- 649 38. Kim D, Langmead B and Salzberg SL. HISAT: a fast spliced aligner with low memory  
650 requirements. Nature methods. 2015;12 4:357-60.

- 651 39. Pertea M, Pertea GM, Antonescu CM, Chang T-C, Mendell JT and Salzberg SL.  
652 StringTie enables improved reconstruction of a transcriptome from RNA-seq reads.  
653 Nature biotechnology. 2015;33 3:290-5.
- 654 40. Haas BJ, Papanicolaou A, Yassour M, Grabherr M, Blood PD, Bowden J, et al. De novo  
655 transcript sequence reconstruction from RNA-seq using the Trinity platform for reference  
656 generation and analysis. Nature protocols. 2013;8 8:1494-512.
- 657 41. Campbell MS, Law M, Holt C, Stein JC, Moghe GD, Hufnagel DE, et al. MAKER-P: a  
658 tool kit for the rapid creation, management, and quality control of plant genome  
659 annotations. Plant physiology. 2014;164 2:513-24.
- 660 42. Stanke M, Steinkamp R, Waack S and Morgenstern B. AUGUSTUS: a web server for  
661 gene finding in eukaryotes. Nucleic acids research. 2004;32 suppl\_2:W309-W12.
- 662 43. Korf I. Gene finding in novel genomes. BMC bioinformatics. 2004;5 1:59.
- 663 44. Borodovsky M, Mills R, Besemer J and Lomsadze A. Prokaryotic gene prediction using  
664 GeneMark and GeneMark. hmm. Current protocols in bioinformatics. 2003;1 1:4.5. 1-  
665 4.5. 16.
- 666 45. Simao Neto F, Waterhouse R, Ioannidis P, Kriventseva E and Zdobnov E. BUSCO:  
667 assessing genome assembly and annotation completeness with single-copy orthologs.  
668 Bioinformatics (Oxford, England). 2015;31 19:3210-2.
- 669 46. Van Bel M, Diels T, Vancaester E, Kreft L, Botzki A, Van de Peer Y, et al. PLAZA 4.0:  
670 an integrative resource for functional, evolutionary and comparative plant genomics.  
671 Nucleic acids research. 2018;46 D1:D1190-D6.
- 672 47. Campbell MS, Holt C, Moore B and Yandell M. Genome annotation and curation using  
673 MAKER and MAKER - P. Current protocols in bioinformatics. 2014;48 1:4.11. 1-4.. 39.
- 674 48. Altschul SF, Madden TL, Schäffer AA, Zhang J, Zhang Z, Miller W, et al. Gapped  
675 BLAST and PSI-BLAST: a new generation of protein database search programs. Nucleic  
676 acids research. 1997;25 17:3389-402.
- 677 49. Jones P, Binns D, Chang H-Y, Fraser M, Li W, McAnulla C, et al. InterProScan 5:  
678 genome-scale protein function classification. Bioinformatics (Oxford, England). 2014;30  
679 9:1236-40.
- 680 50. Waterhouse RM, Seppely M, Simão FA, Manni M, Ioannidis P, Klioutchnikov G, et al.  
681 BUSCO applications from quality assessments to gene prediction and phylogenomics.  
682 Molecular biology and evolution. 2018;35 3:543-8.
- 683 51. Nishimura O, Hara Y and Kuraku S. gVolante for standardizing completeness assessment  
684 of genome and transcriptome assemblies. Bioinformatics (Oxford, England). 2017;33  
685 22:3635-7.
- 686 52. Nawrocki EP and Eddy SR. Infernal 1.1: 100-fold faster RNA homology searches.  
687 Bioinformatics (Oxford, England). 2013;29 22:2933-5.
- 688 53. Kalvari I, Argasinska J, Quinones-Olvera N, Nawrocki EP, Rivas E, Eddy SR, et al.  
689 Rfam 13.0: shifting to a genome-centric resource for non-coding RNA families. Nucleic  
690 acids research. 2018;46 D1:D335-D42.
- 691 54. Kalvari I, Nawrocki EP, Argasinska J, Quinones - Olvera N, Finn RD, Bateman A, et al.  
692 Non - coding RNA analysis using the Rfam database. Current protocols in  
693 bioinformatics. 2018;62 1:e51.
- 694 55. Dongen S. *Graph clustering by flow simulation*. University of Utrecht, Amsterdam,  
695 Netherlands, 2000.

- 696 56. Katoh K and Standley DM. MAFFT multiple sequence alignment software version 7:  
697 improvements in performance and usability. *Molecular biology and evolution*. 2013;30  
698 4:772-80.
- 699 57. Yang Z. PAML 4: phylogenetic analysis by maximum likelihood. *Molecular biology and*  
700 *evolution*. 2007;24 8:1586-91.
- 701 58. Price MN, Dehal PS and Arkin AP. FastTree 2—approximately maximum-likelihood trees  
702 for large alignments. *PloS one*. 2010;5 3:e9490.
- 703 59. Proost S, Fostier J, De Witte D, Dhoedt B, Demeester P, Van de Peer Y, et al. i-ADHoRe  
704 3.0—fast and sensitive detection of genomic homology in extremely large data sets.  
705 *Nucleic acids research*. 2012;40 2:e111-e.
- 706 60. Emms DM and Kelly S. OrthoFinder: phylogenetic orthology inference for comparative  
707 genomics. *Genome biology*. 2019;20 1:1-14.
- 708 61. Whelan S, Irisarri I and Burki F. PREQUAL: detecting non-homologous characters in  
709 sets of unaligned homologous sequences. *Bioinformatics (Oxford, England)*. 2018;34  
710 22:3929-30.
- 711 62. Ronquist F, Teslenko M, Van Der Mark P, Ayres DL, Darling A, Höhna S, et al.  
712 MrBayes 3.2: efficient Bayesian phylogenetic inference and model choice across a large  
713 model space. *Systematic biology*. 2012;61 3:539-42.
- 714 63. Rannala B and Yang Z. Inferring speciation times under an episodic molecular clock.  
715 *Systematic biology*. 2007;56 3:453-66.
- 716 64. Iles WJ, Smith SY, Gandolfo MA and Graham SW. Monocot fossils suitable for  
717 molecular dating analyses. *Bot J Linn Soc*. 2015;178 3:346-74.
- 718 65. Kumar S, Stecher G, Suleski M and Hedges SB. TimeTree: a resource for timelines,  
719 timetrees, and divergence times. *Molecular biology and evolution*. 2017;34 7:1812-9.
- 720 66. Bennetzen JL and Park M. Distinguishing friends, foes, and freeloaders in giant genomes.  
721 *Curr Opin Genet Dev*. 2018;49:49-55.
- 722 67. Schnable PS, Ware D, Fulton RS, Stein JC, Wei F, Pasternak S, et al. The B73 maize  
723 genome: complexity, diversity, and dynamics. *science*. 2009;326 5956:1112-5.
- 724 68. Paterson AH, Bowers JE, Bruggmann R, Dubchak I, Grimwood J, Gundlach H, et al. The  
725 *Sorghum bicolor* genome and the diversification of grasses. *Nature*. 2009;457 7229:551-  
726 6.
- 727 69. Bennetzen JL and Wang H. The contributions of transposable elements to the structure,  
728 function, and evolution of plant genomes. *Annual review of plant biology*. 2014;65:505-  
729 30.
- 730 70. Devos KM, Brown JK and Bennetzen JL. Genome size reduction through illegitimate  
731 recombination counteracts genome expansion in *Arabidopsis*. *Genome research*. 2002;12  
732 7:1075-9.
- 733 71. Ma J, Devos KM and Bennetzen JL. Analyses of LTR-retrotransposon structures reveal  
734 recent and rapid genomic DNA loss in rice. *Genome research*. 2004;14 5:860-9.
- 735 72. Jiao Y, Li J, Tang H and Paterson AH. Integrated syntenic and phylogenomic analyses  
736 reveal an ancient genome duplication in monocots. *The Plant cell*. 2014;26 7:2792-802.
- 737 73. Abdul SD and Jideani AIO. *Fonio (Digitaria spp.) Breeding*. Springer International  
738 Publishing; 2019. p. 47-81.
- 739 74. Soltis D, Soltis P and Rieseberg LH. Molecular data and the dynamic nature of  
740 polyploidy. *Critical reviews in plant sciences*. 1993;12 3:243-73.

- 741 75. Sybenga J. Allopolyploidization of autopolyploids I. Possibilities and limitations.  
742 Euphytica. 1969;18 3:355-71.
- 743 76. Bird KA, VanBuren R, Puzey JR and Edger PP. The causes and consequences of  
744 subgenome dominance in hybrids and recent polyploids. *New Phytologist*. 2018;220  
745 1:87-93.
- 746 77. Lin Z, Li X, Shannon LM, Yeh C-T, Wang ML, Bai G, et al. Parallel domestication of  
747 the *Shattering1* genes in cereals. *Nature genetics*. 2012;44 6:720-4.
- 748 78. Geneious Prime. <https://www.geneious.com>. 2020.
- 749 79. Multani DS, Briggs SP, Chamberlin MA, Blakeslee JJ, Murphy AS and Johal GS. Loss  
750 of an MDR transporter in compact stalks of maize *br2* and sorghum *dw3* mutants.  
751 *Science*. 2003;302 5642:81-4.
- 752 80. Parvathaneni RK, Jakkula V, Padi FK, Faure S, Nagarajappa N, Pontaroli AC, et al. Fine-  
753 mapping and identification of a candidate gene underlying the *d2* dwarfing phenotype in  
754 pearl millet, *Cenchrus americanus* (L.) Morrone. *G3: Genes, Genomes, Genetics*. 2013;3  
755 3:563-72.
- 756 81. Simmonds J, Scott P, Brinton J, Mestre TC, Bush M, Del Blanco A, et al. A splice  
757 acceptor site mutation in *TaGW2-A1* increases thousand grain weight in tetraploid and  
758 hexaploid wheat through wider and longer grains. *Theoretical and Applied Genetics*.  
759 2016;129 6:1099-112.
- 760 82. Song X-J, Huang W, Shi M, Zhu M-Z and Lin H-X. A QTL for rice grain width and  
761 weight encodes a previously unknown RING-type E3 ubiquitin ligase. *Nature genetics*.  
762 2007;39 5:623-30.
- 763 83. Wu TD, Reeder J, Lawrence M, Becker G and Brauer MJ. GMAP and GSNAP for  
764 genomic sequence alignment: enhancements to speed, accuracy, and functionality.  
765 *Statistical genomics*. Springer; 2016. p. 283-334.
- 766 84. Li H. A statistical framework for SNP calling, mutation discovery, association mapping  
767 and population genetical parameter estimation from sequencing data. *Bioinformatics*  
768 (Oxford, England). 2011;27 21:2987-93.
- 769 85. Bradbury PJ, Zhang Z, Kroon DE, Casstevens TM, Ramdoss Y and Buckler ES.  
770 TASSEL: software for association mapping of complex traits in diverse samples.  
771 *Bioinformatics* (Oxford, England). 2007;23 19:2633-5.
- 772 86. Kahle D and Wickham H. *ggmap*: Spatial Visualization with *ggplot2*. *The R journal*.  
773 2013;5 1:144-61.
- 774 87. Raj A, Stephens M and Pritchard JK. *fastSTRUCTURE*: variational inference of  
775 population structure in large SNP data sets. *Genetics*. 2014;197 2:573-89.
- 776 88. Zhu Q, Smith SM, Ayele M, Yang L, Jogi A, Chaluvadi SR, et al. High-throughput  
777 discovery of mutations in *tef* semi-dwarfing genes by next-generation sequencing  
778 analysis. *Genetics*. 2012;192 3:819-29.
- 779 89. Ntui VO, Azadi P, Supaporn H and Mii M. Plant regeneration from stem segment-  
780 derived friable callus of “Fonio”(Digitaria exilis (L.) Stapf.). *Scientia horticulturae*.  
781 2010;125 3:494-9.
- 782 90. Ji X, Yang B and Wang D. Achieving Plant Genome Editing While Bypassing Tissue  
783 Culture. *Trends Plant Sci*. 2020.
- 784 91. Hu N, Xian Z, Li N, Liu Y, Huang W, Yan F, et al. Rapid and user-friendly open-source  
785 CRISPR/Cas9 system for single-or multi-site editing of tomato genome. *Horticulture*  
786 *research*. 2019;6 1:1-14.



- 787 92. Sterck L, Billiau K, Abeel T, Rouze P and Van de Peer Y. ORCAE: online resource for  
788 community annotation of eukaryotes. *Nature Methods*. 2012;9 11:1041-.
- 789 93. Yssel AE, Kao S-M, Van de Peer Y and Sterck L. ORCAE-AOCC: A Centralized Portal  
790 for the Annotation of African Orphan Crop Genomes. *Genes*. 2019;10 12:950.
- 791 94. Yves Van De Peer: Orcae: Online Resource for Community Annotation of Eukaryotes.  
792 <https://bioinformatics.psb.ugent.be/orcae/aocc/overview/Digex> (2020). Accessed June  
793 21 2020.
- 794 95. Wallace J: Fonio diversity 2020. [https://github.com/wallacelab/paper-fonio-diversity-](https://github.com/wallacelab/paper-fonio-diversity-2020)  
795 [2020](https://github.com/wallacelab/paper-fonio-diversity-2020) (2020). Accessed June 21 2020.
- 796 96. Bennetzen JL and Chen S; Ma X WX, Yssel AEJ, Chaluvadi SR, Johnson MS,  
797 Gangashetty P, Hamidou F, Sanogo MD, Zwaenepoel A, Wallace J, Van De Peer Y, Van  
798 Deynze A Supporting data for "Genome sequence and genetic diversity analysis of an  
799 under-domesticated orphan crop, white fonio (*Digitaria exilis*)" GigaScience Database,  
800 2021. <http://doi.org/10.5524/100857>.
- 801

Figure 1

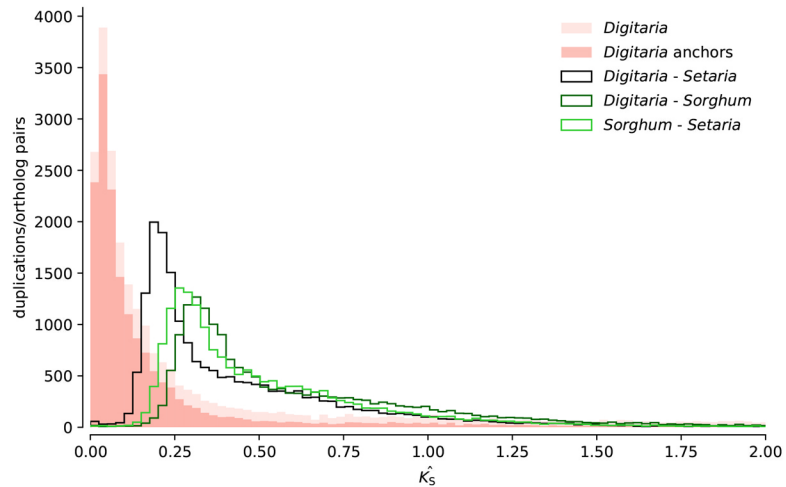

B

[Click here to access/download;Figure;Figure 1.pdf](#)

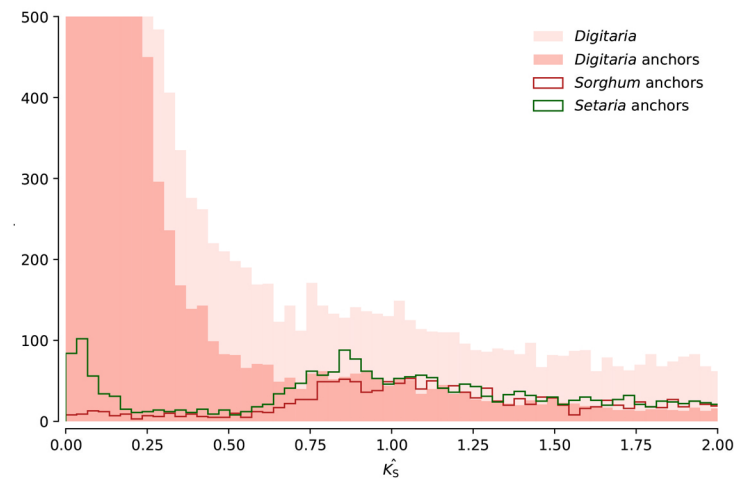

C

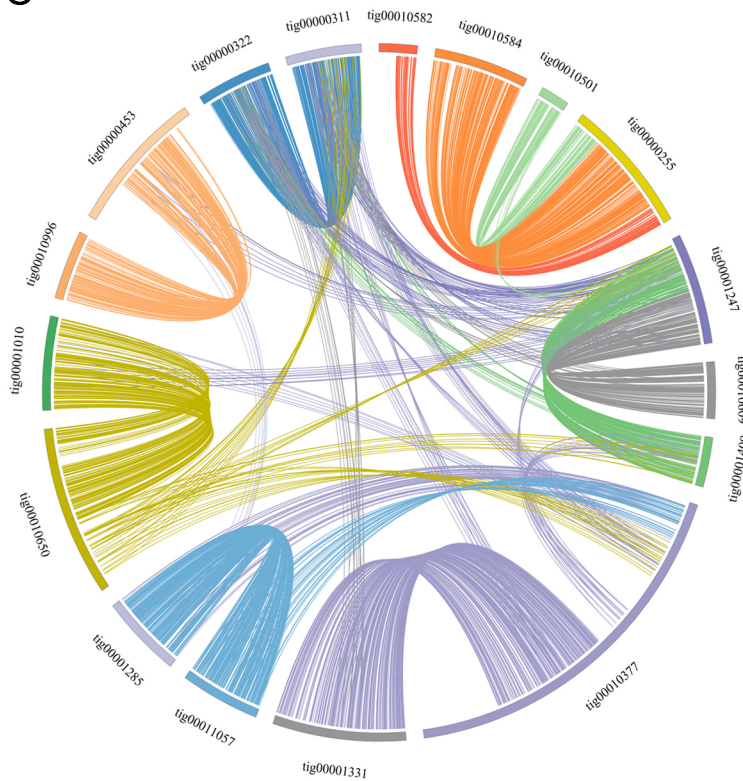

D

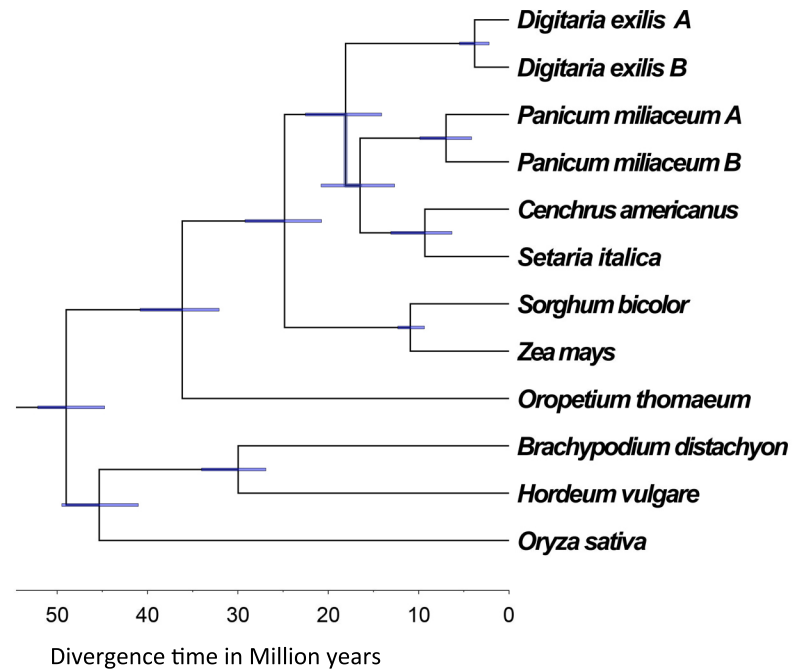

Figure 2

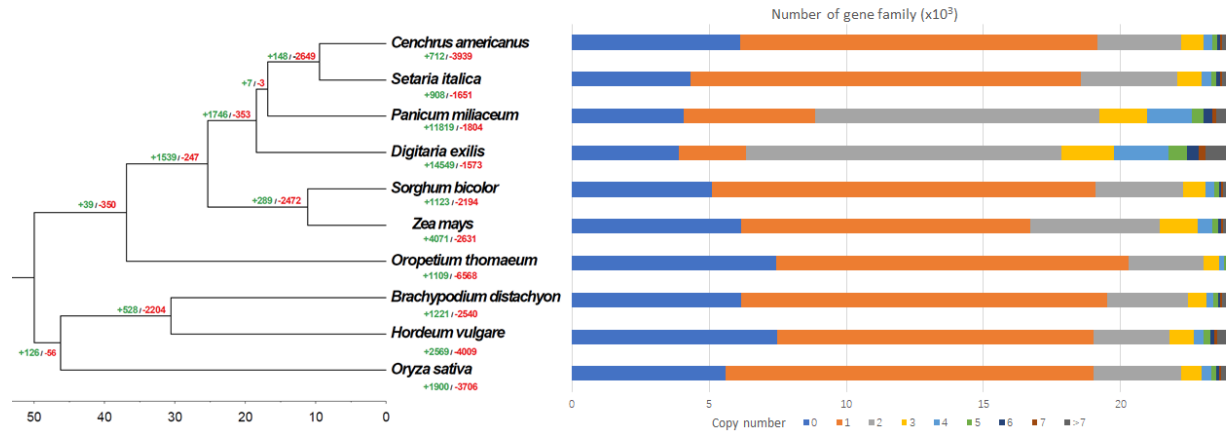

\*green numbers represent genes with greater than 2 copies and red numbers genes with less than 2 copies

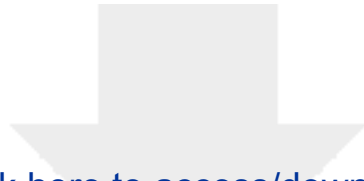

[Click here to access/download](#)

**Supplementary Material**

Supplementary Methods 122020.docx

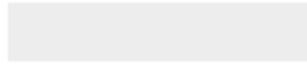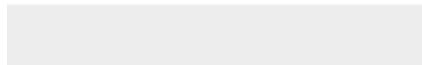

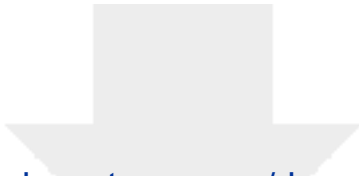

Click here to access/download

**Supplementary Material**

Suppl. Tables and Figures 01192021.docx

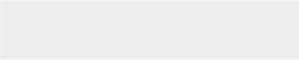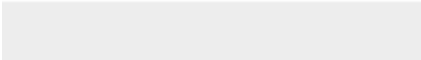

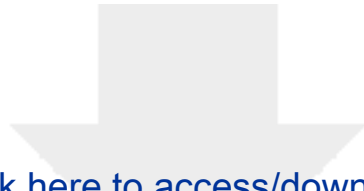

Click here to access/download  
**Supplementary Material**  
Fonio Suppl Table S7and S8.xlsx

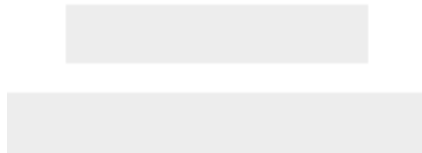

Response to review GIGA-D-20-00197

Dear Editor,

We wish to thank the reviewers for their many thoughtful comments and suggestions. We address all of the issues raised in our replies below, which are in [blue typeface](#). We believe that the additional analyses and revisions that we have made, associated with the reviewers' comments, have significantly improved the manuscript. Please find tracked changes version and clean version.

Sincerely,  
Jeff Bennetzen for all authors

## Comments and responses:

### Reviewer 1

1. The original manuscript seemed to a well oral draft for speaker, especially in the sections of background, plant material and conclusions. Thanks you
2. In the section of Plant material and nucleic preparation, please provide the original source of fonio seeds and its latitude-longitude The contents and their proportions of standard potting soil should be indicated. [Thank you for the suggestion. We have added this information to Plant materials.](#)
3. In the logically, estimation of genome and heterozygosity with illumina reads were before assembly of PacBio reads and polished with illumine reads. Please consider, this is not must revised if it were not necessary. [Thank you for the suggestion. Using raw unassembled reads and kmer analysis is one measure of heterozygosity in polyploid species as referenced by Ranallo-Benavidez, T.R., K.S. Jaron, and M.C. Schatz. 2020. GenomeScope 2.0 and Smudgeplot for reference-free profiling of polyploid genomes. Nature Communications 11:1432, <https://doi.org/10.1038/s41467-020-14998-3>. Genoscope is a tool specifically designed to estimate heterozygosity in polyploids. We have added this reference.](#)
4. Repeat annotation and TE properties are continuous. In the section of TE properties, average size of Gypsy is the double of Copia, why? [Although, we do not have a conclusive answer and, we noted this as well. we discuss this on lines 311-318 in text.](#)
5. For more intuitively, please add the most recent common ancestor and predicted divergence time or confidence interval beside the node in Fig1D. [The analysis presented in Figure 1D uses the most closely related species to fonio that have genome sequences, and all are millets. Namely \*P. millaceum\*, \*S. italica\* and \*C. americanus\*. The diploid ancestors of fonio is not clear \(Abdul et al 2019\) and highly likely to be extinct considering the estimated time of polyploidization 3.1MYA. We added text on these points to lines 339-341.](#)
6. I noticed that KAUST has been upload their genome of D.exilis on NCBI with the BioProject number: PRJEB36539. The quality of assembly sequence in this manuscript is much higher than theirs. Comparing or mentioning their assembly will look fair and highlight the higher quality assembly of the genome you present here. [Thank you for the suggestion. This paper has been published since our submission. We added comparison tables \(Suppl 1\) and Suppl Fig 1 as well as text on page 5. We show that our genome is in significantly better shape, for instance with an L50 of 8 vs 2624, with more of the genome assembled and better BUSCO score and complete](#)

genes annotated, as mentioned on pages 5 and 8. We further compare a typical scaffold in our assembly and show the fragmentation in the Abrouk assembly for the same genomic areas. Some aspects of scaffolding are better in the Abrouk et al genome due to the use of scaffolding technology, Hi-C.

7. The candidate domestication genes were well aligned and discussed. But in the abstract, resilience in hot, dry and low fertility environments of *D.exilis* were highlighted. Have you found special gene families related with these physiological features in your analysis? Excellent resources of resistance gene or TFs are also important for genetic improvement of other cereal crops. Expansion and contraction of gene family might provide some preliminary clues. We added a section on gene family expansion and contraction, including GO enrichments noting emphasis on recognition motifs. See page 13. We do not expand our Discussion of the many hundreds of possible resilience genes *per se*, because we did not perform any experiments related to this subject.

8. RRID numbers were not contained in this original manuscript. We have not created any new softwares or software packages for analyses of these data. All software packages used were “off the shelf” and are described in the MS and supplemental methods. For this reason no new RRID numbers have been generated.

## Reviewer 2

Specific comments:

**Line 44:** Precise in the abstract what genes and traits could be used for fonio

Improvement. We have now added text about the genes discussed. Thank you for this suggestion.

**Line 97:** Revise the Plant material and nucleic acid preparation about Genetic Diversity for Nagoya protocol). Summarize the protocol focusing on fonio. The authors should be more specific See addition in Plant materials and to Genetic diversity lines 450-452.

**Line 99:** A plant of fonio would be valuable to put in as it is an orphan crop. Not a common plant. The authors can add an additional figure with scale for plant, seeds. Although the authors agree and point out that it is an orphan crop, there are many pictures online of fonio, its seed, etc. For example, see <https://en.wikipedia.org/wiki/Fonio>. We respectfully did not add this to the revised MS.

**Line 104:** Describe in detail the method used for DNA isolation rather than giving the reference. This is important for quality control and orphan crops. A brief description of extraction was added, see Lines 105-116

**Line 113:** Give references for SMRT Link and Canu (v1.8). We added references to these software packages. Thanks for pointing out this omission.

**Line 115:** Pilon (v 1.23) : remove space Done.

**Line 118:** The longest contig is 10.17 Mb and the shortest contig is 1013 bp: Give the average contig. The mean value has been added to this line, now line 133.

**Line 131-133:** What is your hypothesis about the reduction of the genome size of 200 Mb? That is a large portion of the genome not captured. Provide explanations See lines 160-162.

**Line 209:** Summarize the protocol here or add the parameters you used. Respectfully, as we used the protocol exactly as defined in Kalvari et al., we defer to the reference.

**Line 209:** This sentence does not make sense for non-coding RNAs, it will be better if the authors add the percentage of non-coding RNAs types within the 4741 RNAs. Also,



add citations for the other plant genomes. We have added the percentage of RNAs in text (Line 246) and also to Supplement Table 3.

**Line 224:** Repetition Plaza Also, this sentence does not make sense. We have revised for clarity, so now see line 261.

**Line 240:** There is an extra parenthesis Corrected.

**Line 299:** The hypothesis for major rearrangements on the genome is not well supported. Please provide more pieces of evidence. We have added a whole section on gene expansion and contraction to further discuss this point, including single copy genes rather duplicated genes expected in a tetraploid. Note, although we do not have a chromosome level assembly (see Reviewer 1, question 6) we show very high contiguity of the genome to accurately assess the rearrangements and synteny Suppl Fig S1, and Suppl Fig S4.

**Line 323:** Shattering genes are essential in fonio since the farmers harvest before the maturity to limit yield loss. The figures shouldn't appear in the supplemental information to highlight its importance. Although we agree, this is one of several important examples. The MS already has many figures and tables highlighting broad analyses. For this reason, we chose to keep the figure at a supplemental level.

**Line 369:** For crops like fonio, the threshold for heterozygosity that the author used is very conservative. Have the authors tried <10% and 15%? We performed the analysis at several heterozygosity thresholds, and this value was the one that provided the most resolution of the fonio populations. At this high level of heterozygosity, it is certain that some of the differentiation is actually between paralogs, but these differences are lineage-specific (hence the high resolution between accessions), and thus assist us in the process of accessing differences and commonalities in the fonio germplasm that was analyzed.

**Line 370:** The three clusters should be discussed in deep instead of just saying that they correlate with the geographical map. This section needs revisions on its own. This discussion has been expanded, on lines 448-450.

**Lines 377-383:** This paragraph does not make sense.

This paragraph describes the diversity analyses methods and was included in Supplemental methods under Genetic Diversity Analysis.

**Line 390:** The authors did not provide evidence for day length dependence in mutations. The sentence is only meant to reflect that daylength-dependence is an additional example of an important domestication gene. Genetic mapping in many other crops have shown that allelic variation (i.e., natural mutation) at these day-length dependence genes is involved in crop domestication, but we do not have any way of showing which specific mutations would be particularly appropriate goals for improvement at such loci in fonio. Such determination is for future studies.

### Reviewer 3

1. Two sequencing platforms were used in the study; PacBio and Illumina. Even though the assembly almost covers the estimated genome size, it is presented as 3333 contigs. What is the difficulty faced by the authors to construct it into chromosome level? Small genome size as well as the availability of long reads could make it more feasible to construct the chromosomes. Also, only 88% of the RNAseq reads could be aligned to genome, which shows the incompleteness of the assembly. How do the authors justify this? Please see reviewer 1 Question 6.

2. Line no. 83

"is some transcript sequence data [13] at NCBI." [We have updated this reference.](#)

Line No. 164.

"Illumina RNA sequencing data (paired-end 100 bp) of *Digitaria exilis* [13] were downloaded".

Here the reference cited is wrong. [We corrected the reference to Sarah et al. 2017](#)

3. 67855 protein coding gene were identified from the assembly. This is quite a large number compared to other related plants. However, it is expected due to the allotetraploid nature of the plant and 4.3% single nucleotide variation was observed in between the sub- genomes. All analyzed domestication genes are duplicated in fonio compared to other related plants. Apart from the expected doubling, is there an expansion in any particular gene family? [Thank you for the suggestion. Indeed, there are many. We compared expansion and contraction \(single copy\) relative to \*O. sativa\* genes for the full range of GO annotations in fonio and several other species. We added a section, Figure 2 and Suppl Figures S5 and S6 to address this important issue. This discussion begins on page 13.](#)

4. Is there any gene unique to either of the sub- genomes? [Although this is certainly an interesting point, our genome assembly is not at the chromosome level, so subgenomes cannot be comprehensively compared. We do shed light on the topic by identifying single copy genes, as discussed in previous question. These results are in page 13, Figure S5 and Figure 2](#)

5. Please provide legends for Fig. S1- A and B. [We believe that the reviewer misread the legend and is referring to Fig S2 A and B \(and C\) which have legends. Fig s1 is a single figure. \(Note these are figures now called Suppl Fig S2 and S3\).](#)
