# Supplementary material for: Genome sequence and genetic diversity analysis of an under-domesticated orphan crop, white fonio (Digitaria exilis)
Source: PubMed Central journal article supplement (PMC7953496; doi:10.1093/gigascience/giab013), 2021-03-12
Supplement: giab013_response_to_reviewer_comments_original_submission.pdf [file giab013_response_to_reviewer_comments_original_submission.pdf]

## Author's Response To Reviewer Comments

Close

See enclosed file under Personal Cover-Response to Review and Manuscript R1 tracked changes.

Close
